# Supplementary material for: A Phase I Open-Label Study to Identify a Dosing Regimen of the Pan-AKT Inhibitor AZD5363 for Evaluation in Solid Tumors and in PIK3CA -Mutated Breast and Gynecologic Cancers
Source: Oxford University Press journal article supplement (doi:10.1158/1078-0432.ccr-17-2260), 2017-10-24
Supplement: 10780432ccr172260-sup-187317_2_supp_4311169_3xb32r.xlsx [file 10780432ccr172260-sup-187317_2_supp_4311169_3xb32r.xlsx]

## Sheet: Sheet 1
Part	Tissue type for central testing (P=primary; M=metastatic)	Time between tissue used for central testing and plasma collection (years)	PTEN status tissue (IHC)	PIK3CATissue			PIK3CA Baseline plasma		ESR1 Baseline plasma	Discontinuation plasma PIK3CA	Discontinuation plasma ESR1
				Local Tumour	Central Tumour cobas roche (PCR)	BioRad ddPCR (E542K, E545K, H1047L/R)	Central Plasma cobas roche (PCR)	BioRad ddPCR (E542K, E545K, H1047L/R)	BioRad ddPCR (D538G, Y537C/N/S)	BioRad ddPCR (E542K, E545K, H1047L/R)	BioRad ddPCR (D538G, Y537C/N/S)
C breast	P	5.46575	-	H1047R	H1047X	H1047R	H1047X	ND	ND	ND	ND
C gynae	M	0.61	-	E542K	E542K	not tested	E542K, M1043I	E542K	ND	E542K	not tested
C breast	P	22.4575	-	H1047Q, D1045E	H1047X	ND	H1047X	ND	ND	ND	ND
C breast	M	0.0410959	-	H1047R	H1047X	H1047R	H1047X	H1047R	Y537C	not tested	not tested
C gynae	P	1.13	-	E545A	not tested	not tested	ND	ND	ND	not tested	not tested
C gynae	P	N/A	positive	H1047L	not tested	ND	not tested	not tested	not tested	not tested	not tested
C gynae	P	1.66	positive	H1047R	H1047X	H1047R, E545K	H1047X	H1047R	ND	not tested	not tested
C breast	M	0.747945	positive	E545K	E545X, Q546X	E545K	E545X	E545K	Y537S	not tested	not tested
C gynae	M	N/A	positive	E542K	E542K, H1047X	E542K, H1047R	not tested	not tested	not tested	not tested	not tested
C gynae	P	N/A	positive	N345K	N345K	E542K, E545K	not tested	not tested	not tested	not tested	not tested
C gynae	P	6.16	-	H1047R	H1047X	not tested	H1047X	ND	ND	not tested	not tested
C breast	P	N/A	positive	M1043V	ND	E542K, E545K	not tested	not tested	not tested	not tested	not tested
C gynae	P	N/A	-	E542K	not tested	not tested	not tested	not tested	not tested	not tested	not tested
C breast	M	3.05753	positive	not done	H1047X	H1047R, E545K	ND	H1047R	ND	not tested	not tested
C breast	P	3.18356	-	not done	ND	ND	E542K	E542K	ND	not tested	not tested
C breast	P	N/A	positive	E545K	E545X	E545K	not tested	not tested	not tested	not tested	not tested
C breast	M	N/A	positive	H1047R	H1047X	H1047R, E545K	not tested	not tested	not tested	not tested	not tested
C breast	M	N/A	negative	H1047R	E545X	E545K	not tested	not tested	not tested	not tested	not tested
C breast	M	N/A	-	N345K	N345K	H1047R, E545K, E542K	not tested	not tested	not tested	not tested	not tested
C breast	P	N/A	negative	E545K	STATUS UNKNOWN	E545K	not tested	not tested	not tested	not tested	not tested
C breast	P	N/A	positive	R88Q	ND	ND	not tested	not tested	not tested	not tested	not tested
C breast	P	N/A	positive	E542K	E542K	E542K	not tested	not tested	not tested	not tested	not tested
C gynae	P	N/A	positive	E545K	E545X	E545K, E542K	not tested	not tested	not tested	not tested	not tested
C gynae	P	0.97	negative	E542K	E542K	E542K, E545K	E542K	E542K	ND	not tested	not tested
C breast	M	0.00821918	-	not done	H1047X	H1047R	H1047X	H1047R	ND	not tested	not tested
C gynae	P	N/A	positive	E542K	E542K	E542K, E545K	not tested	not tested	not tested	not tested	not tested
C breast	P	4.36164	-	not done	H1047X	H1047R, E545K, E542K	H1047X	H1047R	D538G	not tested	not tested
C breast	P	3.69315	-	not done	Q546X	H1047R, E545K, E542K	ND	ND	ND	not tested	not tested
C breast	P	22.5644	positive	not done	H1047X	H1047R, E545K, E542K	ND	ND	Y537S	not tested	not tested
C gynae	P	N/A	-	E545X	E545X	E545K	not tested	not tested	not tested	not tested	not tested
C gynae	M	N/A	negative	C420R	C420R	E545K	not tested	not tested	not tested	not tested	not tested
C breast	P	4.83288	positive	not done	E545X, Q546X, H1047X	E545K, H1047R	E545X	E545K	ND	not tested	not tested
C gynae	P	N/A	positive	N345K	N345K	Undetermined	not tested	not tested	not tested	not tested	not tested
C gynae	P	N/A	positive	E542K	E542K	E542K	not tested	not tested	not tested	not tested	not tested
C breast	P	N/A	positive	E545K	ND	E545K	not tested	not tested	not tested	not tested	not tested
C gynae	P	N/A	-	R108H, E545K	E545X	E545K	not tested	not tested	not tested	E545K	not tested
C gynae	P	N/A	negative	R93W	R88Q	not tested	not tested	not tested	not tested	not tested	not tested
C breast	M	N/A	positive	E545G	N345K	E545K	not tested	not tested	not tested	not tested	not tested
C breast	P	N/A	positive	H1047R	H1047X	H1047R. E542K	not tested	not tested	not tested	not tested	not tested
C gynae	P	N/A	-	H1047R	H1047X	not tested	not tested	not tested	not tested	H1047R	not tested
C gynae	M	N/A	positive	E545K	E545X	E545K, E542K	not tested	not tested	not tested	not tested	not tested
C gynae	P	N/A	positive	H1047R	H1047X	H1047R	not tested	not tested	not tested	not tested	not tested
C breast	P	12.5479	-	not done	E542K	E542K, E545K	E542K	E542K	ND	not tested	not tested
C breast	P	0.0657534	-	not done	E542K, E545X	E542K, E545K	ND	ND	ND	Undetermined	ND
C gynae	P	N/A	-	R1023Q	ND	not tested	not tested	not tested	not tested	not tested	not tested
C breast	M	2.52603	positive	not done	H1047X	H1047R	H1047X	H1047R	ND	not tested	not tested
C gynae	P	2.77	-	H1047L	H1047X	not tested	ND	ND	ND	not tested	not tested
C gynae	P	1.53	positive	E545K	ND	ND	ND	E545K	ND	not tested	not tested
C gynae	M	0.33	positive	R88Q	R88Q	E545K, H1047R	R88Q	ND	ND	not tested	not tested
C gynae	P	0.27	positive	E453_D454del	ND	ND	ND	ND	ND	not tested	not tested
C breast	M	N/A	positive	E542K	ND	E545K	not tested	not tested	not tested	not tested	not tested
C breast	M	1.49041	positive	H1047R	H1047X	H1047R, E545K	H1047X	H1047R	D538G	not tested	not tested
C gynae	P	0.66	positive	ND (C363T, synonymous)	ND	not tested	ND	ND	ND	not tested	not tested
C breast	P	2.62192	positive	E542K, E529K	E542K	E542K	ND	ND	ND	not tested	not tested
C breast	M	2.49315	-	H1047R	H1047X	H1047R, E542K, E545K	ND	ND	ND	ND	ND
C breast	P	5.07945	-	E542K	E542K	E542K, E545K	ND	ND	ND	not tested	not tested
C breast	M	0	positive	not done	H1047X	H1047R	H1047X	ND	ND	not tested	not tested
C gynae	P	1.56	positive	H1047R	H1047X	H1047R	ND	ND	ND	not tested	not tested
C gynae	M	N/A	-	E545K	not tested	not tested	ND	ND	ND	not tested	not tested
ND = not detected
